# Supplementary material
Source: MDPI journal article supplement (https://www.mdpi.com/2071-1050/15/8/6431)
Supplement: s1 [file s1]

## Canadian consumer sustainability Survey: Questionnaire summary

| <b>Section I: Consumption behavior and sustainability</b>                                                                                                                                                                                                                                                                                                                                                                                                                                                                                                                                                                                                                                                                                                                                                                              |                         |
|----------------------------------------------------------------------------------------------------------------------------------------------------------------------------------------------------------------------------------------------------------------------------------------------------------------------------------------------------------------------------------------------------------------------------------------------------------------------------------------------------------------------------------------------------------------------------------------------------------------------------------------------------------------------------------------------------------------------------------------------------------------------------------------------------------------------------------------|-------------------------|
| <p>How important are the following factors when you are making food purchasing decisions in a grocery store?</p> <ul style="list-style-type: none"> <li>- Vegan/Vegetarian friendly</li> <li>- Fair Trade</li> <li>- Price</li> <li>- Nutrition</li> <li>- Sustainably produced</li> <li>- Free of genetically modified organisms</li> <li>- Certified Organic</li> <li>- Hormone or antibiotic free</li> <li>- Preservative free</li> <li>- Ecologically responsible (Eco-label)</li> <li>- Natural ingredients</li> <li>- Recyclable packaging</li> <li>- Free range/grass-fed</li> <li>- Produced using renewable energy such as solar or wind power</li> <li>- Locally grown or raised</li> <li>- Other factors</li> </ul>                                                                                                         | Five-point Likert scale |
| <p>What does sustainable food mean to you?</p> <p>To me, sustainable food:</p> <ul style="list-style-type: none"> <li>- Protects the nature including the diversity of both plants and animals and avoids damaging or wasting natural resources</li> <li>- Provides good quality food, safe and healthy products</li> <li>- Contributes to thriving local economics (for instance lower production costs for producers)</li> <li>- None of the above</li> <li>- I don't know</li> </ul>                                                                                                                                                                                                                                                                                                                                                | Multiple choice         |
| Do you deliberately seek out sustainable food products in a grocery store?                                                                                                                                                                                                                                                                                                                                                                                                                                                                                                                                                                                                                                                                                                                                                             | Yes/No                  |
| How often do you buy or consumer sustainable food products?                                                                                                                                                                                                                                                                                                                                                                                                                                                                                                                                                                                                                                                                                                                                                                            | Five-point Likert scale |
| <p>I choose to buy or consume sustainable food products because:</p> <ul style="list-style-type: none"> <li>- they are healthy</li> <li>- they are fresher than conventional products</li> <li>- they are safer than conventional products</li> <li>- I care for the environment</li> <li>- I want to support local producers</li> <li>- they taste better/more natural</li> <li>- they have a longer shelf-life than conventional products</li> <li>- Other</li> <li>- Not applicable</li> <li>- I don't know</li> </ul>                                                                                                                                                                                                                                                                                                              | Multiple choice         |
| <p>I choose not to buy or consumer sustainable food products because ...</p> <ul style="list-style-type: none"> <li>- they are not available</li> <li>- they are too expensive</li> <li>- they lack convenience</li> <li>- they are similar to conventional products</li> <li>- Other</li> <li>- Not applicable</li> <li>- I don't know</li> </ul>                                                                                                                                                                                                                                                                                                                                                                                                                                                                                     | Multiple choice         |
| <p>To what extent do you agree with the following statements?</p> <ul style="list-style-type: none"> <li>- Sustainable food/agricultural products are an effective way of feeding a growing global population</li> <li>- Sustainable food/agricultural products have better overall quality (nutrition, taste, etc.) than conventional products</li> <li>- Sustainable food/agricultural products improve producer's welfare</li> <li>- The cost of producing sustainable food/agricultural products is cheaper than producing conventional products</li> <li>- Sustainable food/agricultural are more affordable than conventional products</li> <li>- Production of sustainable food/agricultural products requires less water usage</li> <li>- Production of sustainable food/agricultural products improves soil health</li> </ul> | Five-point Likert scale |

|                                                                                                                                                                                                                                                                                                                                                                                                                                                                                                                                                                                                                                                                                                                                                                                                                                                                                                                                                                                                                     |                         |
|---------------------------------------------------------------------------------------------------------------------------------------------------------------------------------------------------------------------------------------------------------------------------------------------------------------------------------------------------------------------------------------------------------------------------------------------------------------------------------------------------------------------------------------------------------------------------------------------------------------------------------------------------------------------------------------------------------------------------------------------------------------------------------------------------------------------------------------------------------------------------------------------------------------------------------------------------------------------------------------------------------------------|-------------------------|
| <ul style="list-style-type: none"> <li>- Production of sustainable food/agricultural products requires less chemical/pesticide use</li> <li>- Production of sustainable food/agricultural products help address climate change</li> <li>- Production of sustainable food/agricultural products preserves biodiversity</li> <li>- Production of sustainable food/agricultural products promotes animal welfare</li> <li>- Other benefit</li> </ul>                                                                                                                                                                                                                                                                                                                                                                                                                                                                                                                                                                   |                         |
| Are you involved with, a member of or do you follow an environmental organization/movement?                                                                                                                                                                                                                                                                                                                                                                                                                                                                                                                                                                                                                                                                                                                                                                                                                                                                                                                         | Yes/No                  |
| <b>Section II: Food innovation</b>                                                                                                                                                                                                                                                                                                                                                                                                                                                                                                                                                                                                                                                                                                                                                                                                                                                                                                                                                                                  |                         |
| <p>How familiar are you with the following innovations in the agri-food sector?</p> <ul style="list-style-type: none"> <li>- Plant-based meat alternatives (For example veggie burger, Beyond burger )</li> <li>- Biofuels</li> <li>- Biofortified food products</li> <li>- Genetically modified products</li> <li>- Cellular agriculture (for example cell-cultured meat)</li> <li>- Nutraceuticals</li> <li>- Gene editing technology (for example non-browning potatoes)</li> <li>- CRISPR</li> <li>- Others</li> </ul>                                                                                                                                                                                                                                                                                                                                                                                                                                                                                          | Five-point Likert scale |
| <p>Which of the following factors might influence you to try innovative food or agricultural products (select all that apply):</p> <ul style="list-style-type: none"> <li>- Allergies /food sensitivities</li> <li>- Health concerns</li> <li>- Weight management</li> <li>- Affordable price</li> <li>- Concern about animal welfare</li> <li>- Concern about the environmental impact</li> <li>- Availability in stores</li> <li>- Ethical/religious reasons</li> <li>- Other reasons</li> <li>- I don't know</li> </ul>                                                                                                                                                                                                                                                                                                                                                                                                                                                                                          | Multiple choice         |
| <ul style="list-style-type: none"> <li>- Improving yields in crops and commodities</li> <li>- removing allergens in crops and commodities (Wheat, peanuts)</li> <li>- reducing saturated and trans fats in crops and commodities (Wheat, peanuts, eggs)</li> <li>- enriching nutrients in crops and commodities (Wheat, peanuts, eggs)</li> <li>- breeding crops resistant to diseases/pests/insects</li> <li>- breeding crops resistant to severe weather conditions such as drought</li> <li>- allowing farmers to reduce pesticide use</li> <li>- allowing farmers to use less fertilizer</li> <li>- allowing farmers to conserve water</li> <li>- reducing food waste when breeding fruits and vegetables, like apples and potatoes, with a natural resistance to bruising and browning, extending use and shelf life.</li> <li>- eliminating the threat of diseases in animals</li> <li>- creating natural immunity and improving the overall health of livestock without the need for antibiotics.</li> </ul> | Five-point Likert scale |
| <b>Section III: Sources of information and trust</b>                                                                                                                                                                                                                                                                                                                                                                                                                                                                                                                                                                                                                                                                                                                                                                                                                                                                                                                                                                |                         |
| <p>Which of the following listed sources do you use or consult to get information on sustainable food and agricultural products? (Select all that apply)</p> <ul style="list-style-type: none"> <li>- Friends or family members</li> <li>- Licensed healthcare professional</li> <li>- Internet/online (Google searches, blogs, etc.)</li> <li>- Television/Radio</li> <li>- Magazines/newspapers/cookbooks/books</li> <li>- Labels on food packaging</li> <li>- Social media platforms (for example: Instagram, Facebook, Twitter)</li> <li>- Government of Canada (For example: Health Canada)</li> <li>- Educational institutions (school, university, etc.)</li> <li>- Food companies</li> <li>- Supermarket/retail store</li> <li>- Farmers' organizations</li> <li>- Consumer advocacy groups</li> </ul>                                                                                                                                                                                                      | Multiple choice         |

|                                                                                                                                                                                                                                                                                                                                                                                                                                                                                                                                                                                                                                                                                                                                                                                               |                                                                                                                                                                                                                                                                                           |
|-----------------------------------------------------------------------------------------------------------------------------------------------------------------------------------------------------------------------------------------------------------------------------------------------------------------------------------------------------------------------------------------------------------------------------------------------------------------------------------------------------------------------------------------------------------------------------------------------------------------------------------------------------------------------------------------------------------------------------------------------------------------------------------------------|-------------------------------------------------------------------------------------------------------------------------------------------------------------------------------------------------------------------------------------------------------------------------------------------|
| <ul style="list-style-type: none"> <li>- Environmental non-governmental organizations</li> <li>- Other</li> <li>- None. I don't care</li> </ul>                                                                                                                                                                                                                                                                                                                                                                                                                                                                                                                                                                                                                                               |                                                                                                                                                                                                                                                                                           |
| <p>Please indicate the extent to which you trust the following sources for accurate information about sustainable food and agricultural products:</p> <ul style="list-style-type: none"> <li>- Friends and family</li> <li>- Licensed healthcare professional</li> <li>- Internet/online</li> <li>- Television</li> <li>- Magazines and newspapers</li> <li>- Labels on food packages</li> <li>- Social media platforms (e.g., Facebook, Twitter)</li> <li>- Federal government (e.g., Health Canada)</li> <li>- Food companies</li> <li>- Farmers' organizations</li> <li>- Consumer advocacy groups</li> <li>- Environmental non-governmental organizations</li> <li>- Other</li> </ul>                                                                                                     | Multiple choice                                                                                                                                                                                                                                                                           |
| <p>Please indicate the extent to which you trust the following sources for accurate information about innovation in food and agricultural products such as gene editing:</p> <ul style="list-style-type: none"> <li>- Friends and family</li> <li>- Licensed healthcare professional</li> <li>- Internet/online</li> <li>- Television</li> <li>- Magazines and newspapers</li> <li>- Labels on food packages</li> <li>- Social media platforms (e.g., Facebook, Twitter)</li> <li>- Federal government (e.g., Health Canada)</li> <li>- University scientists</li> <li>- Multinational food companies</li> <li>- Farmers' organizations</li> <li>- Consumer advocacy groups</li> <li>- Environmental non-governmental organizations</li> <li>- Other</li> <li>- None. I don't care</li> </ul> | Five-point Likert scale                                                                                                                                                                                                                                                                   |
| <b>Section IV: Socio-demographics</b>                                                                                                                                                                                                                                                                                                                                                                                                                                                                                                                                                                                                                                                                                                                                                         |                                                                                                                                                                                                                                                                                           |
| <p>How would you describe your daily diet?</p> <ul style="list-style-type: none"> <li>- My diet includes ALL animal- and plant-based food with no restrictions</li> <li>- My diet includes fewer meat products</li> <li>- My diet includes animal-derived products such as milk and cheese, and excludes meat products such as beef, chicken, and fish/seafood</li> <li>- My diet includes fruits and vegetables, and exclude all types of meat and animal-based products such as eggs, milk, and honey</li> <li>- Prefer not to say</li> </ul>                                                                                                                                                                                                                                               | Single choice                                                                                                                                                                                                                                                                             |
| What is your gender identity?                                                                                                                                                                                                                                                                                                                                                                                                                                                                                                                                                                                                                                                                                                                                                                 | Male/Female                                                                                                                                                                                                                                                                               |
| How old are you?                                                                                                                                                                                                                                                                                                                                                                                                                                                                                                                                                                                                                                                                                                                                                                              | <p>Single choice</p> <ul style="list-style-type: none"> <li>- 18-24 years old</li> <li>- 25-34 years old</li> <li>- 35-44 years old</li> <li>- 45-54 years old</li> <li>- 55-64 years old</li> <li>- 65-75 years old</li> <li>- Over 75 years old</li> <li>- Prefer not to say</li> </ul> |
| In which province or territory do you currently live?                                                                                                                                                                                                                                                                                                                                                                                                                                                                                                                                                                                                                                                                                                                                         | <p>Single choice</p> <ul style="list-style-type: none"> <li>- Alberta</li> <li>- British Columbia</li> <li>- Manitoba</li> <li>- New Brunswick</li> <li>- Newfoundland and Labrador</li> </ul>                                                                                            |

|                                                                                                                                                       |                                                                                                                                                                                                                                                                                                                                             |
|-------------------------------------------------------------------------------------------------------------------------------------------------------|---------------------------------------------------------------------------------------------------------------------------------------------------------------------------------------------------------------------------------------------------------------------------------------------------------------------------------------------|
|                                                                                                                                                       | <ul style="list-style-type: none"> <li>- Nova Scotia</li> <li>- Quebec</li> <li>- Ontario</li> <li>- Prince Edward Island</li> <li>- Saskatchewan</li> <li>- Northwest Territories</li> <li>- Nunavut</li> <li>- Yukon</li> <li>- Prefer not to say</li> </ul>                                                                              |
| Are there children younger than 18 years old live in your household?                                                                                  | Yes/No                                                                                                                                                                                                                                                                                                                                      |
| What is your highest completed level of education?                                                                                                    | Single choice <ul style="list-style-type: none"> <li>- Elementary school</li> <li>- Secondary (high) school</li> <li>- Technical/College /University</li> <li>- Graduate studies</li> <li>- Prefer not to say</li> </ul>                                                                                                                    |
| What is your current employment status?                                                                                                               | Single choice <ul style="list-style-type: none"> <li>- Working full time</li> <li>- Working part time</li> <li>- Self employed</li> <li>- Unemployed</li> <li>- A student</li> <li>- Retired</li> <li>- Homemaker</li> <li>- Other</li> <li>- Prefer not to say</li> </ul>                                                                  |
| What type of community you live in?                                                                                                                   | Rural/Urban                                                                                                                                                                                                                                                                                                                                 |
| Do/Did you study/work in agri-food related major/industry?                                                                                            | Yes/No                                                                                                                                                                                                                                                                                                                                      |
| For comparison purposes only, which one of the following best describes the annual income level of your household (in Canadian dollars) before taxes? | Single choice <ul style="list-style-type: none"> <li>- Under \$29,999</li> <li>- \$30,000 - \$49,999</li> <li>- \$50,000 - \$69,999</li> <li>- \$70,000 - \$89,999</li> <li>- \$90,000 - \$109,999</li> <li>- \$110,000 - \$129,999</li> <li>- \$130,000 - \$149,999</li> <li>- More than \$150,000</li> <li>- Prefer not to say</li> </ul> |
